# Supplementary material for: Sociodemographic and Economic Traits That Affect Malaria Prevalence in Sussundenga Village, Mozambique.
Source: Research Square preprint supplement (doi:10.21203/rs.3.rs-131541/v1), 2020-12-22
Supplement: Supplementary file 1 [file d3e19be1fe31514f8755a2c6.docx]

**Table 4. Variables in the equation in final model**

| **Variables in the Equation** | | | | | | | | | |
| --- | --- | --- | --- | --- | --- | --- | --- | --- | --- |
|  | | B | S.E. | Wald | Df | Sig. | Exp(B) (OR) | 95% C.I.for EXP(B) (OR) | |
| Lower | Upper |
| Step 1a | Sex | .080 | .260 | .095 | 1 | .758 | 1.084 | .651 | 1.804 |
| Malaria treatment | -.667 | .262 | 6.480 | 1 | .011 | .513 | .307 | .858 |
| Employment | -.242 | .208 | 1.354 | 1 | .245 | .785 | .522 | 1.180 |
| Phone | .066 | .162 | .167 | 1 | .682 | 1.068 | .778 | 1.467 |
| Education | -.132 | .182 | .532 | 1 | .466 | .876 | .614 | 1.250 |
| HHSize | .629 | .340 | 3.427 | 1 | .064 | 1.876 | .964 | 3.651 |
| Age category | -.304 | .207 | 2.152 | 1 | .142 | .738 | .492 | 1.107 |
| “Bairros” of living | .113 | .066 | 2.935 | 1 | .087 | 1.120 | .984 | 1.275 |
| Constant | -1.296 | .806 | 2.589 | 1 | .108 | .274 |  |  |
| a. Variable(s) entered on step 1: mal_treat, employment, phone, education6, HH size, Age categ, Bairro, constant. | | | | | | | | | |
